# Supplementary material for: Comprehensive methylome analysis of ovarian tumors reveals hedgehog signaling pathway regulators as prognostic DNA methylation biomarkers
Source: PubMed Central journal article supplement — Epigenetics. 2013 May 10;8(6):624–34. doi: 10.4161/epi.24816 (PMC3857342; doi:10.4161/epi.24816), 2013-05-10
Supplement: epi-8-624-s01.pdf [file epi-8-624-s01.pdf]

## **Supplemental Material to:**

**Rui-Lan Huang, Fei Gu, Nameer B. Kirma, Jianhua Ruan, Chun-Liang Chen, Hui-Chen Wang, Yu-Ping Liao, Cheng-Chang Chang, Mu-Hsien Yu, Jay M. Pilrose, Ian M. Thompson, Hsuan-Cheng Huang, Tim Hui-Ming Huang, Hung-Cheng Lai and Kenneth P. Nephew**

**Comprehensive methylome analysis of ovarian tumors reveals hedgehog signaling pathway regulators as prognostic DNA methylation biomarkers**

**Epigenetics 2013; 8(6)**

**<http://dx.doi.org/10.4161/epi.24816>**

**[http://www.landesbioscience.com/journals/epigenetics/  
article/24816/](http://www.landesbioscience.com/journals/epigenetics/article/24816/)**

## Supplementary Figure S1

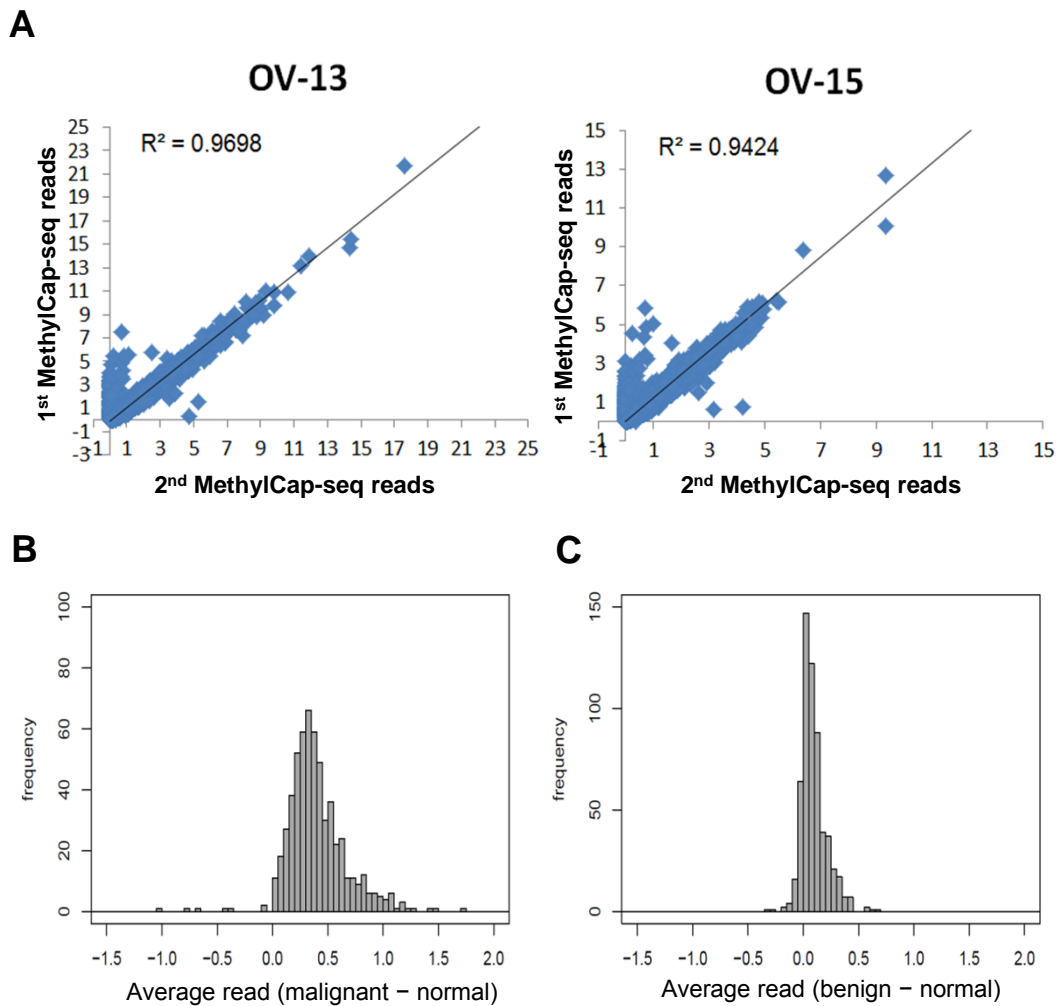

**Supplementary Figure S1.** Global analysis of DNA methylation profiles in ovarian samples. A, Correlation between experimental replication (two samples). Each point represents the raw methylation level normalized read numbers. B, Histogram showing the differentially averaged reads between malignant and normal tissues. C, Histogram showing the differentially average reads between benign and normal tissues.

## Supplementary Figure S2

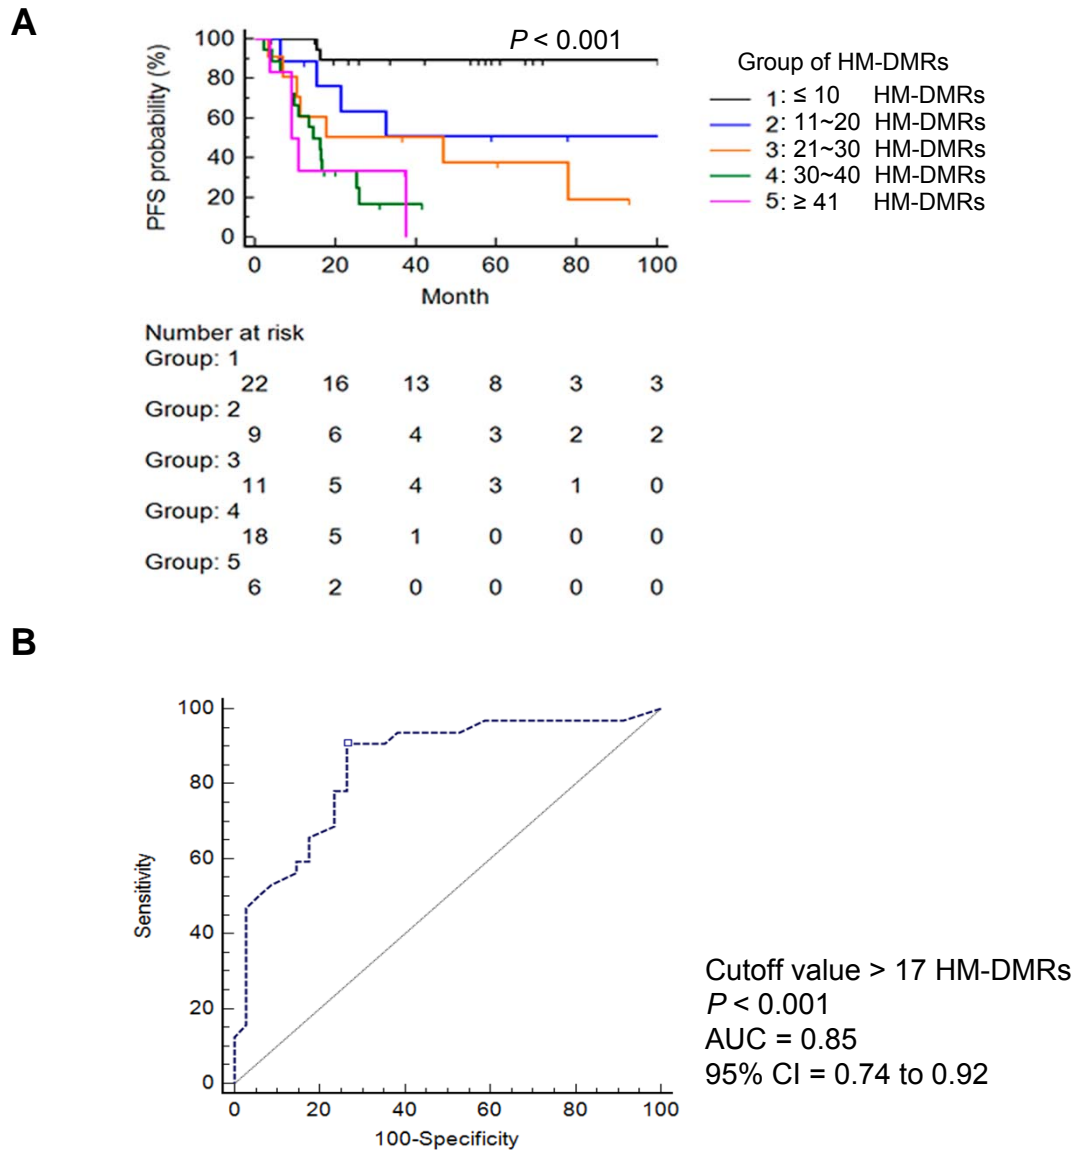

**Supplementary Figure S2.** Identifying recurrent patients with highest accuracy. A, Greater number of high methylation differentially methylated regions (HM-DMRs) is related to worse progression-free survival. B, Using area under the receiver operating characteristic (ROC) curve (AUC) to determine the best cutoff point to identify recurrent patients in 63 DMRs.

## Supplementary Figure S3

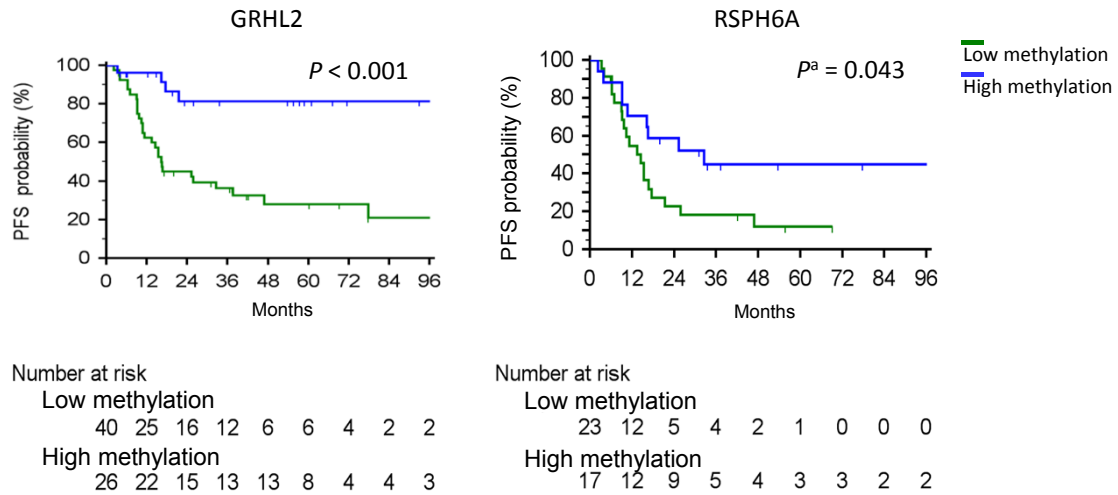

**Supplementary Figure S3.** Two high methylation (HM) DMRs related to good progression-free survival. <sup>a</sup>Adjusted stage

## Supplementary Figure S4

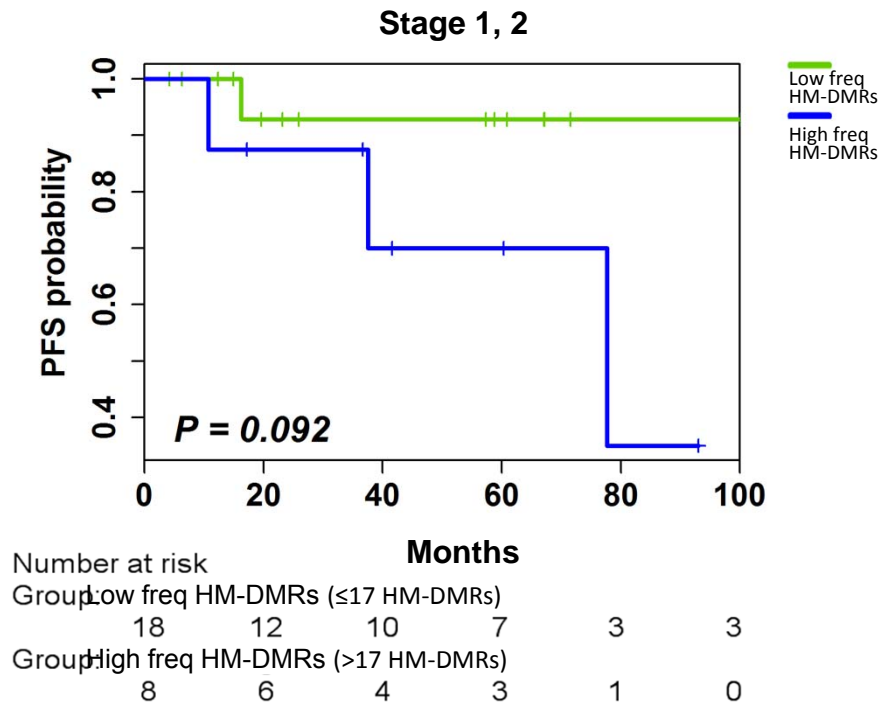

**Supplementary Figure S4.** High frequency HM-DMRs tended to be associated with shorter PFS and low frequency HM-DMRs with longer PFS.



## Supplementary Figure S6

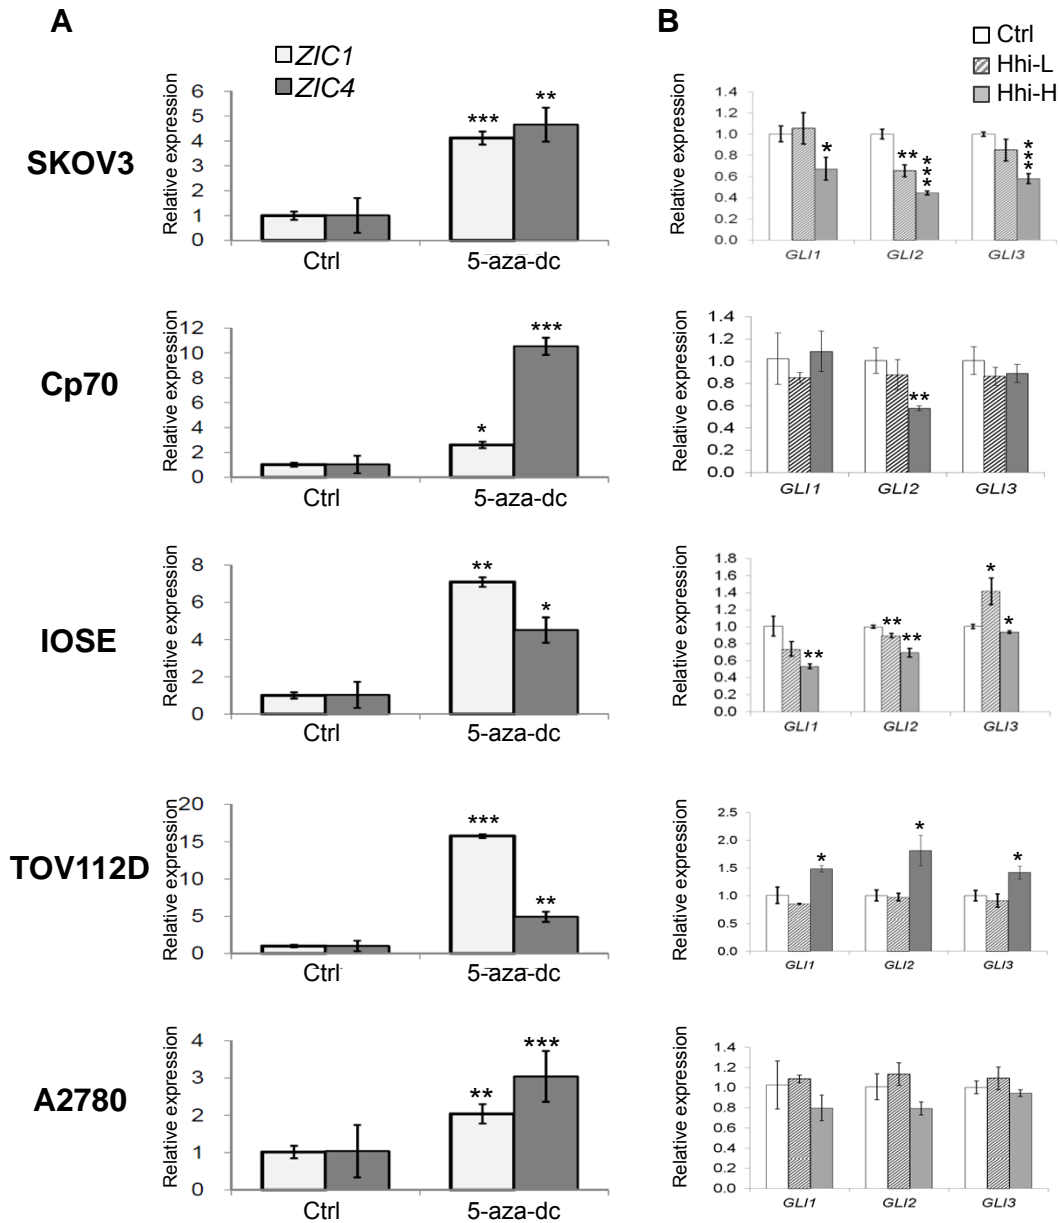

**Supplementary Figure S6.** Gene expression of *ZICs* and *GLIs*. A. Treatment with 5-aza-dc (DNA methyltransferase inhibitor) restores *ZIC1* and *ZIC4* expression. B. Expression of *GLIs* after treatment with the Hedgehog (Hh) inhibitor cyclopamine (Hhi-L = 1  $\mu$ M cyclopamine, Hhi-H, 8  $\mu$ M cyclopamine).  $10^6$  OC cells were drug-treated for three days. Ctrl, no drug treatment. (\*,  $P < 0.05$ ; \*\*,  $P < 0.01$  and \*\*\*,  $P < 0.001$  by two-tailed t-test)

## Supplementary Figure S7

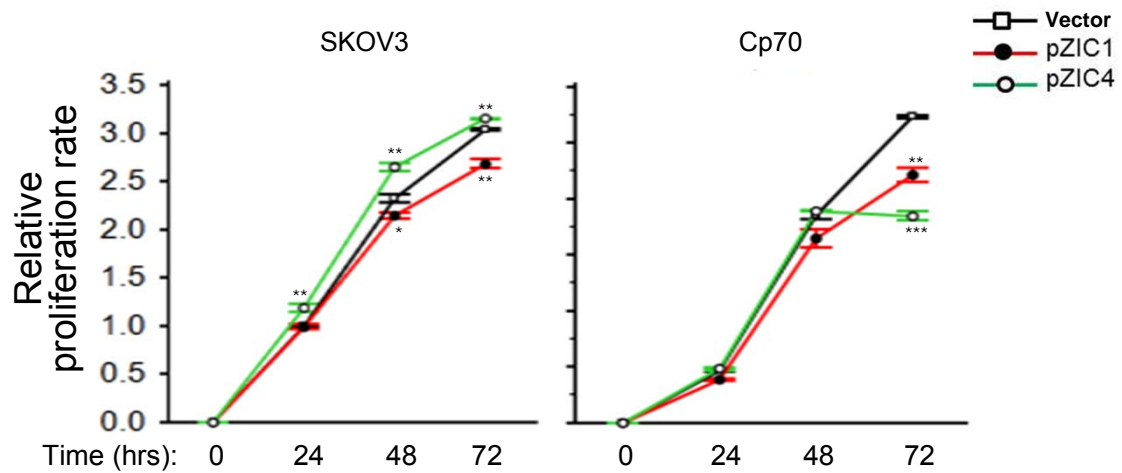

**Supplementary Figure S7.** *ZIC1* or *ZIC4* overexpression modulates ovarian cancer cell proliferation. A, Effect of enforced *ZIC1* or *ZIC4* on proliferation rate in SKOV3 or Cp70. Overexpression of *ZIC1* inhibited proliferation of both OC cell lines tested (SKOV3 and Cp70) compared to vector control, while *ZIC4* only reduced Cp70 cell proliferation. Vector, vector only; pZIC1, pCMV-*ZIC1* plasmid and pZIC4, pCMV-*ZIC4* plasmid. (\*,  $P < 0.05$ ; \*\*,  $P < 0.01$  and \*\*\*,  $P < 0.001$  by two-tailed t-test)



## Supplementary Figure S8

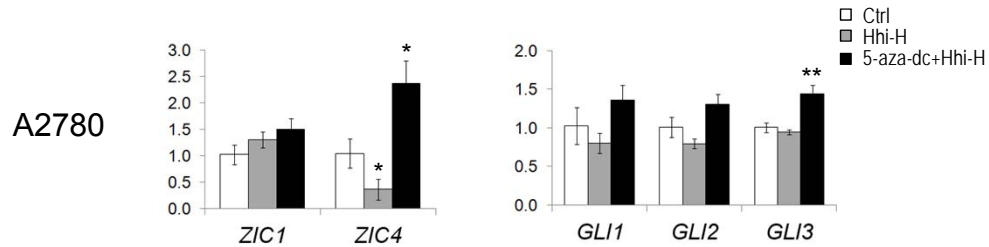

**Supplementary Figure S8.** Correlation of expression of *ZICs* and *GLIs* in platinum sensitive ovarian cell line (A2780). Treatment with Hh inhibitor resulted in weak repression of expression of *GLIs*. Restored *ZIC1* and *ZIC4* expression was associated with induced expression of *GLIs* in A2780 cells. (\*,  $P < 0.05$ ; \*\*,  $P < 0.01$  and \*\*\*,  $P < 0.001$  by two-tailed t-test)

**Supplementary Table S1.** Clinical characteristics of patients and samples for MethylCap-seq analysis

|              | Malignant<br>( <i>N</i> = 75) |      | Benign <sup>a</sup><br>( <i>N</i> = 20) |      | Normal<br>( <i>N</i> = 6) |
|--------------|-------------------------------|------|-----------------------------------------|------|---------------------------|
|              | Number of patients            | %    | Number of patients                      | %    | Number of patients        |
| Age (years)  |                               |      |                                         |      |                           |
| Mean±SD      | 57.1 ± 13.77                  |      | 41.15 ± 13.38                           |      | 51.33 ± 13.37             |
| Range        | 29 - 90                       |      | 26 - 80                                 |      | 28 - 77                   |
| FIGO stage   |                               |      |                                         |      |                           |
| Stage 1      | 18                            | 24.0 |                                         |      |                           |
| Stage 2      | 8                             | 10.7 |                                         |      |                           |
| Stage 3      | 42                            | 56.0 |                                         |      |                           |
| Stage 4      | 7                             | 9.3  |                                         |      |                           |
| Grading      |                               |      |                                         |      |                           |
| G1           | 13                            | 17.3 |                                         |      |                           |
| G2           | 18                            | 24.0 |                                         |      |                           |
| G3           | 44                            | 58.7 |                                         |      |                           |
| Histology    |                               |      |                                         |      |                           |
| Serous       | 50                            | 66.7 | 7                                       | 35.0 |                           |
| Mucinous     | 16                            | 21.3 | 6                                       | 30.0 |                           |
| Endometrioid | 4                             | 5.3  | 7                                       | 35.0 |                           |
| Clear Cell   | 5                             | 6.7  |                                         |      |                           |

Abbreviations: MethylCap-seq, methyl-CpG binding domain of the MBD2 protein to capture DNA followed by high-throughput next- generation sequencing; *N*, the number of patients; SD, Standard deviation; FIGO stage, it followed the International Federation of Gynecology and Obstetrics staging system to identify the stage. <sup>a</sup>The determined pathology of tissues is cystic adenoma.

**Supplementary Table S2.** Multivariate COX analysis of high methylation DMRs (HM-DMR) associated with progression free survival (N = 63)

| Gene Name              | HR   | 95% CI |      | <i>P</i> <sup>a</sup> | Gene Name | HR   | 95% CI |      | <i>P</i> <sup>a</sup> |
|------------------------|------|--------|------|-----------------------|-----------|------|--------|------|-----------------------|
| ADAMTS5                | 2.43 | 1.14   | 5.18 | 0.021                 | MIR1205   | 3.04 | 1.43   | 6.47 | 0.004                 |
| ADRB1                  | 2.20 | 1.05   | 4.59 | 0.036                 | MIR1224   | 2.21 | 1.07   | 4.55 | 0.031                 |
| AGAP2                  | 2.39 | 1.14   | 5.00 | 0.020                 | MIR125B1  | 2.40 | 1.16   | 4.96 | 0.018                 |
| AK1                    | 3.08 | 1.38   | 6.88 | 0.006                 | MIR25     | 2.27 | 1.07   | 4.83 | 0.033                 |
| ARHGDI1                | 2.27 | 1.11   | 4.63 | 0.024                 | MIR93     | 2.17 | 1.03   | 4.60 | 0.043                 |
| C16orf35               | 2.38 | 1.11   | 5.07 | 0.025                 | NBL1      | 2.33 | 1.11   | 4.87 | 0.025                 |
| C1orf104               | 2.41 | 1.16   | 5.02 | 0.019                 | NEUROG1   | 2.44 | 1.16   | 5.15 | 0.019                 |
| C1QL3                  | 2.87 | 1.37   | 6.03 | 0.005                 | NFIX      | 2.18 | 1.04   | 4.60 | 0.040                 |
| CCDC17                 | 2.88 | 1.32   | 6.29 | 0.008                 | NID2      | 2.33 | 1.05   | 5.15 | 0.037                 |
| DLEU7                  | 2.77 | 1.32   | 5.79 | 0.007                 | NKX2-8    | 2.54 | 1.17   | 5.52 | 0.019                 |
| FAM131A                | 2.99 | 1.40   | 6.37 | 0.005                 | OLFML3    | 2.95 | 1.38   | 6.29 | 0.005                 |
| FGF12                  | 3.52 | 1.64   | 7.54 | 0.001                 | PHF2      | 4.09 | 1.85   | 9.03 | 0.000                 |
| FOXA1                  | 2.77 | 1.19   | 6.45 | 0.018                 | PLEKHG2   | 2.20 | 1.07   | 4.54 | 0.032                 |
| FOXL2                  | 2.31 | 1.11   | 4.82 | 0.026                 | PRRT1     | 2.30 | 1.12   | 4.75 | 0.024                 |
| GRHL2                  | 0.22 | 0.07   | 0.70 | 0.010                 | PTGER1    | 2.56 | 1.24   | 5.29 | 0.011                 |
| HDLBP1                 | 2.17 | 1.01   | 4.66 | 0.046                 | RORC      | 2.53 | 1.18   | 5.43 | 0.017                 |
| HIST1H2BB              | 2.73 | 1.31   | 5.69 | 0.007                 | RSPH6A    | 0.42 | 0.19   | 0.92 | 0.031                 |
| HIST1H3A               | 3.01 | 1.43   | 6.33 | 0.004                 | SHOX2     | 2.93 | 1.36   | 6.29 | 0.006                 |
| HIST1H3C               | 2.80 | 1.34   | 5.84 | 0.006                 | SKI       | 2.10 | 1.01   | 4.36 | 0.046                 |
| HIST1H3E               | 2.60 | 1.27   | 5.31 | 0.009                 | SNORA71A  | 2.93 | 1.41   | 6.09 | 0.004                 |
| HIST1H4I               | 2.47 | 1.16   | 5.27 | 0.019                 | SPON2     | 2.29 | 1.09   | 4.77 | 0.028                 |
| HNF1B                  | 2.51 | 1.16   | 5.44 | 0.020                 | SRRT      | 2.61 | 1.24   | 5.48 | 0.011                 |
| HNRNPF                 | 3.12 | 1.44   | 6.73 | 0.004                 | SSBP4     | 2.21 | 1.08   | 4.51 | 0.030                 |
| HOXB5                  | 2.53 | 1.17   | 5.50 | 0.019                 | TAF4      | 3.38 | 1.52   | 7.55 | 0.003                 |
| IRS1                   | 2.49 | 1.16   | 5.37 | 0.020                 | TAL1      | 3.01 | 1.38   | 6.57 | 0.006                 |
| KLF1                   | 3.04 | 1.39   | 6.65 | 0.005                 | TBX5      | 2.58 | 1.15   | 5.79 | 0.022                 |
| LOC283392              | 2.33 | 1.11   | 4.87 | 0.025                 | TCFL5     | 2.42 | 1.16   | 5.06 | 0.019                 |
| LOC404266 <sup>b</sup> | 2.26 | 1.08   | 4.70 | 0.030                 | TRH       | 3.28 | 1.44   | 7.48 | 0.005                 |
| LOC404266 <sup>c</sup> | 3.13 | 1.40   | 6.99 | 0.005                 | VGLL4     | 2.56 | 1.20   | 5.46 | 0.015                 |
| MED26                  | 4.20 | 2.01   | 8.76 | 0.000                 | WISP2     | 4.00 | 1.80   | 8.88 | 0.001                 |
| MEIS2                  | 3.41 | 1.55   | 7.49 | 0.002                 | ZBTB12    | 3.09 | 1.49   | 6.38 | 0.002                 |
|                        |      |        |      |                       | ZIC1      | 2.25 | 1.09   | 4.63 | 0.027                 |

HR, hazard ratio; CI, confidence interval

<sup>a</sup>Adjusted for age, stage, grade, histology. <sup>b</sup>loci at chr17: 44022672 ~ 44026632; <sup>c</sup>loci at chr17: 44026338 ~ 44030298

**Supplementary Table S3.** Identification of recurrent patients by area under the receiver operating characteristic (ROC) curve (AUC) at CpG sites of *ZIC1* promoter

| <b>CpG site</b> | <b>Cutoff value</b> | <b>Highest accuracy</b> | <b>95 % CI</b> |      |
|-----------------|---------------------|-------------------------|----------------|------|
| CpG 1           | 36.9                | 60.7                    | 43.5           | 67.2 |
| CpG 2           | 49.5                | 63.0                    | 48.9           | 72.2 |
| CpG 3           | 46.9                | 60.8                    | 42.1           | 65.9 |
| CpG 4           | 74.0                | 62.0                    | 48.2           | 71.6 |
| CpG 5           | 81.6                | 61.9                    | 46.4           | 70.0 |
| CpG 6           | 52.6                | 68.8                    | 54.4           | 77.0 |
| CpG 7           | 30.0                | 67.4                    | 50.5           | 73.7 |

CI, confidence interval

**Supplementary Table S4.** Univariate and multivariate Cox survival analysis for the association between the risk of high methylation of *ZIC1* at CpG site 7, clinical variables and progression free survival

| Variable    | N  | Univariate analysis |        |       |                              | Multivariate analysis |        |       |                              |
|-------------|----|---------------------|--------|-------|------------------------------|-----------------------|--------|-------|------------------------------|
|             |    | HR                  | 95% CI |       | <i>P</i> -value <sup>a</sup> | HR                    | 95% CI |       | <i>P</i> -value <sup>a</sup> |
| Age         |    |                     |        |       |                              |                       |        |       |                              |
| ≤60 yrs     | 32 | 1.00                |        |       |                              | 1.00                  |        |       |                              |
| >60 yrs     | 41 | 1.35                | 0.68   | 2.66  | 0.391                        | 0.85                  | 0.34   | 1.72  | n.s.                         |
| Methylation |    |                     |        |       |                              |                       |        |       |                              |
| Low         | 36 | 1.00                |        |       |                              | 1.00                  |        |       |                              |
| High        | 37 | 2.56                | 1.27   | 5.16  | <b><i>0.009</i></b>          | 2.45                  | 1.17   | 5.13  | <b><i>0.017</i></b>          |
| FIGO stage  |    |                     |        |       |                              |                       |        |       |                              |
| Early       | 29 | 1.00                |        |       |                              | 1.00                  |        |       |                              |
| Advanced    | 44 | 12.57               | 3.82   | 41.38 | <b><i>&lt;0.001</i></b>      | 11.85                 | 2.94   | 47.74 | <b><i>&lt;0.001</i></b>      |
| Grade       |    |                     |        |       |                              |                       |        |       |                              |
| G1          | 16 | 1.00                |        |       |                              | 1.00                  |        |       |                              |
| G2+G3       | 57 | 3.31                | 1.16   | 9.43  | <b><i>0.025</i></b>          | 2.31                  | 0.77   | 6.88  | n.s.                         |
| Histology   |    |                     |        |       |                              |                       |        |       |                              |
| Others      | 20 | 1.00                |        |       |                              | 1.00                  |        |       |                              |
| Serous      | 53 | 3.32                | 1.17   | 9.43  | <b><i>0.024</i></b>          | 0.77                  | 0.21   | 2.75  | n.s.                         |

Abbreviations: HR, Hazard ratio; 95% CI, 95 percent of the confidence interval; N, case number. <sup>a</sup>Significant permutation *P*-values are marked with boldface and italic (n.s. = not significant).

**Supplementary Table S5.** Correlation between methylated CpG site 6 of *ZIC1* and clinical features of ovarian cancer patients

| Variables  | High methylation<br>(N= 37) | Low methylation<br>(N=36) | <i>P</i> -value <sup>a</sup> |
|------------|-----------------------------|---------------------------|------------------------------|
| Age        |                             |                           | 0.061                        |
| <= 60 yrs  | 12                          | 20                        |                              |
| >60 yrs    | 25                          | 16                        |                              |
| FIGO stage |                             |                           | 0.097                        |
| Early      | 11                          | 18                        |                              |
| Advanced   | 26                          | 18                        |                              |
| Grade      |                             |                           | 0.581                        |
| G1         | 7                           | 9                         |                              |
| G2+G3      | 30                          | 27                        |                              |
| Histology  |                             |                           | 1                            |
| Serous     | 27                          | 26                        |                              |
| Others     | 10                          | 10                        |                              |
| Recurrent  |                             |                           |                              |
| Yes        | 23                          | 12                        | <b><i>0.019</i></b>          |
| No         | 14                          | 24                        |                              |

<sup>a</sup> Fisher's exact test. Significant permutation *P*-value is marked with boldface and italic.

**Supplementary Table S6.** Summary of sequencing reads in ovarian samples

| Tissue Type | ID     | Total      | Uniquely Mapped | Uniquely Mapped Rate (%) | Multiple Mapped | Multiple Mapped Rate (%) | Non-Mapped | Non-Mapped Rate (%) |
|-------------|--------|------------|-----------------|--------------------------|-----------------|--------------------------|------------|---------------------|
| Malignant   | OV_001 | 51,426,864 | 23,670,379      | 46.0                     | 19,888,630      | 38.7                     | 7,867,855  | 15.3                |
|             | OV_002 | 36,801,551 | 18,713,055      | 50.8                     | 13,163,261      | 35.8                     | 4,925,235  | 13.4                |
|             | OV_003 | 43,135,082 | 21,928,452      | 50.8                     | 15,494,697      | 35.9                     | 5,711,933  | 13.2                |
|             | OV_004 | 50,698,774 | 23,999,391      | 47.3                     | 17,281,064      | 34.1                     | 9,418,319  | 18.6                |
|             | OV_005 | 42,193,347 | 20,163,197      | 47.8                     | 16,524,347      | 39.2                     | 5,505,803  | 13.0                |
|             | OV_006 | 27,073,087 | 13,703,498      | 50.6                     | 9,926,961       | 36.7                     | 3,442,628  | 12.7                |
|             | OV_007 | 40,693,376 | 19,151,154      | 47.1                     | 15,457,500      | 38.0                     | 6,084,722  | 15.0                |
|             | OV_008 | 50,115,760 | 33,205,342      | 66.3                     | 11,215,623      | 22.4                     | 5,694,795  | 11.4                |
|             | OV_009 | 31,276,716 | 13,098,498      | 41.9                     | 10,809,244      | 34.6                     | 7,368,974  | 23.6                |
|             | OV_010 | 45,082,274 | 20,995,104      | 46.6                     | 17,629,521      | 39.1                     | 6,457,649  | 14.3                |
|             | OV_011 | 87,927,703 | 50,857,684      | 57.8                     | 28,952,439      | 32.9                     | 8,117,580  | 9.2                 |
|             | OV_012 | 22,856,701 | 12,902,547      | 56.4                     | 7,913,124       | 34.6                     | 2,041,030  | 8.9                 |
|             | OV_013 | 90,752,113 | 46,014,096      | 50.7                     | 33,055,031      | 36.4                     | 11,682,986 | 12.9                |
|             | OV_014 | 42,982,723 | 18,700,819      | 43.5                     | 18,041,850      | 42.0                     | 6,240,054  | 14.5                |
|             | OV_015 | 70,893,683 | 39,971,677      | 56.4                     | 22,124,803      | 31.2                     | 8,797,203  | 12.4                |
|             | OV_016 | 48,733,227 | 25,151,374      | 51.6                     | 16,656,883      | 34.2                     | 6,924,970  | 14.2                |
|             | OV_017 | 35,769,858 | 19,597,423      | 54.8                     | 11,868,646      | 33.2                     | 4,303,789  | 12.0                |
|             | OV_018 | 50,046,958 | 27,001,292      | 54.0                     | 16,716,206      | 33.4                     | 6,329,460  | 12.6                |
|             | OV_019 | 43,917,023 | 19,300,474      | 43.9                     | 16,870,551      | 38.4                     | 7,745,998  | 17.6                |
|             | OV_020 | 62,314,344 | 20,569,531      | 33.0                     | 25,742,251      | 41.3                     | 16,002,562 | 25.7                |
|             | OV_021 | 43,208,574 | 21,108,985      | 48.9                     | 15,806,401      | 36.6                     | 6,293,188  | 14.6                |
|             | OV_022 | 38,672,163 | 18,816,966      | 48.7                     | 14,611,723      | 37.8                     | 5,243,474  | 13.6                |
|             | OV_023 | 81,860,296 | 43,698,780      | 53.4                     | 29,162,743      | 35.6                     | 8,998,773  | 11.0                |
|             | OV_024 | 34,921,460 | 18,193,369      | 52.1                     | 12,957,495      | 37.1                     | 3,770,596  | 10.8                |
|             | OV_025 | 71,171,031 | 37,836,768      | 53.2                     | 25,130,148      | 35.3                     | 8,204,115  | 11.5                |
|             | OV_026 | 47,147,393 | 24,470,546      | 51.9                     | 16,914,584      | 35.9                     | 5,762,263  | 12.2                |
|             | OV_027 | 46,220,176 | 20,378,196      | 44.1                     | 17,273,838      | 37.4                     | 8,568,142  | 18.5                |
|             | OV_028 | 52,321,071 | 22,017,509      | 42.1                     | 19,342,036      | 37.0                     | 10,961,526 | 21.0                |
|             | OV_029 | 37,242,826 | 17,087,466      | 45.9                     | 15,332,083      | 41.2                     | 4,823,277  | 13.0                |
|             | OV_030 | 48,932,669 | 27,090,154      | 55.4                     | 14,988,156      | 30.6                     | 6,854,359  | 14.0                |
|             | OV_031 | 38,350,420 | 17,430,828      | 45.5                     | 14,915,322      | 38.9                     | 6,004,270  | 15.7                |
|             | OV_032 | 40,229,206 | 19,700,916      | 49.0                     | 14,693,880      | 36.5                     | 5,834,410  | 14.5                |
|             | OV_033 | 49,031,011 | 22,607,232      | 46.1                     | 19,582,097      | 39.9                     | 6,841,682  | 14.0                |
|             | OV_034 | 46,974,803 | 22,627,727      | 48.2                     | 17,959,034      | 38.2                     | 6,388,042  | 13.6                |
|             | OV_035 | 41,486,536 | 21,116,730      | 50.9                     | 13,243,702      | 31.9                     | 7,126,104  | 17.2                |
|             | OV_036 | 50,650,061 | 20,339,308      | 40.2                     | 21,243,380      | 41.9                     | 9,067,373  | 17.9                |
|             | OV_037 | 40,939,788 | 17,382,787      | 42.5                     | 16,891,978      | 41.3                     | 6,665,023  | 16.3                |
|             | OV_038 | 43,914,694 | 22,051,063      | 50.2                     | 15,062,016      | 34.3                     | 6,801,615  | 15.5                |
|             | OV_039 | 47,570,583 | 29,374,685      | 61.7                     | 12,582,387      | 26.4                     | 5,613,511  | 11.8                |
|             | OV_040 | 45,444,974 | 23,954,420      | 52.7                     | 15,300,730      | 33.7                     | 6,189,824  | 13.6                |
|             | OV_041 | 48,814,285 | 21,286,959      | 43.6                     | 19,352,824      | 39.6                     | 8,174,502  | 16.7                |
|             | OV_042 | 47,089,054 | 20,648,253      | 43.8                     | 16,521,171      | 35.1                     | 9,919,630  | 21.1                |
|             | OV_043 | 42,220,337 | 21,103,783      | 50.0                     | 13,104,835      | 31.0                     | 8,011,719  | 19.0                |
|             | OV_044 | 52,926,334 | 14,525,262      | 27.4                     | 15,212,109      | 28.7                     | 23,188,963 | 43.8                |
|             | OV_045 | 45,115,267 | 19,171,780      | 42.5                     | 16,563,002      | 36.7                     | 9,380,485  | 20.8                |
|             | OV_046 | 47,325,198 | 20,132,053      | 42.5                     | 18,577,464      | 39.3                     | 8,615,681  | 18.2                |
|             | OV_047 | 57,226,451 | 22,566,315      | 39.4                     | 24,019,850      | 42.0                     | 10,640,286 | 18.6                |
|             | OV_048 | 47,427,666 | 24,909,330      | 52.5                     | 13,245,767      | 27.9                     | 9,272,569  | 19.6                |
|             | OV_049 | 45,081,582 | 21,154,435      | 46.9                     | 18,809,399      | 41.7                     | 5,117,748  | 11.4                |
|             | OV_050 | 40,987,704 | 20,585,424      | 50.2                     | 13,524,106      | 33.0                     | 6,878,174  | 16.8                |
|             | OV_051 | 53,327,179 | 23,541,458      | 44.1                     | 21,345,069      | 40.0                     | 8,440,652  | 15.8                |
|             | OV_052 | 44,591,388 | 18,274,602      | 41.0                     | 18,327,786      | 41.1                     | 7,989,000  | 17.9                |
|             | OV_053 | 38,109,581 | 18,381,164      | 48.2                     | 15,200,087      | 39.9                     | 4,528,330  | 11.9                |
|             | OV_054 | 43,377,479 | 17,968,673      | 41.4                     | 14,981,000      | 34.5                     | 10,427,806 | 24.0                |
|             | OV_055 | 41,393,592 | 16,264,905      | 39.3                     | 14,124,946      | 34.1                     | 11,003,741 | 26.6                |
|             | OV_056 | 44,861,398 | 20,877,080      | 46.5                     | 16,303,070      | 36.3                     | 7,681,248  | 17.1                |
|             | OV_057 | 37,612,212 | 20,041,638      | 53.3                     | 13,372,853      | 35.6                     | 4,197,721  | 11.2                |
|             | OV_058 | 33,276,817 | 16,437,532      | 49.4                     | 11,181,260      | 33.6                     | 5,658,025  | 17.0                |
|             | OV_059 | 43,637,750 | 21,335,858      | 48.9                     | 15,813,173      | 36.2                     | 6,488,719  | 14.9                |
|             | OV_060 | 36,964,466 | 13,699,585      | 37.1                     | 11,515,327      | 31.2                     | 11,749,554 | 31.8                |

**Supplementary Table S6.** Summary of sequencing reads in ovarian samples

| Tissue Type      | ID         | Total      | Uniquely Mapped | Uniquely Mapped Rate (%) | Multiple Mapped | Multiple Mapped Rate (%) | Non-Mapped | Non-Mapped Rate (%) |
|------------------|------------|------------|-----------------|--------------------------|-----------------|--------------------------|------------|---------------------|
| <b>Malignant</b> | OV_061     | 45,547,326 | 21,272,716      | 46.7                     | 17,070,881      | 37.5                     | 7,203,729  | 15.8                |
|                  | OV_062     | 45,691,543 | 24,845,261      | 54.4                     | 15,624,408      | 34.2                     | 5,221,874  | 11.4                |
|                  | OV_063     | 35,071,467 | 15,426,963      | 44.0                     | 14,857,596      | 42.4                     | 4,786,908  | 13.6                |
|                  | OV_064     | 45,632,269 | 26,575,261      | 58.2                     | 13,224,260      | 29.0                     | 5,832,748  | 12.8                |
|                  | OV_065     | 53,388,183 | 25,281,602      | 47.4                     | 18,647,744      | 34.9                     | 9,458,837  | 17.7                |
|                  | OV_066     | 37,847,644 | 18,026,200      | 47.6                     | 14,486,340      | 38.3                     | 5,335,104  | 14.1                |
|                  | OV_067     | 54,535,847 | 23,665,187      | 43.4                     | 19,023,738      | 34.9                     | 11,846,922 | 21.7                |
|                  | OV_068     | 42,464,680 | 19,168,300      | 45.1                     | 18,102,315      | 42.6                     | 5,194,065  | 12.2                |
|                  | OV_069     | 51,445,347 | 27,277,370      | 53.0                     | 15,897,575      | 30.9                     | 8,270,402  | 16.1                |
|                  | OV_070     | 31,611,270 | 12,271,064      | 38.8                     | 12,381,896      | 39.2                     | 6,958,310  | 22.0                |
|                  | OV_071     | 35,111,975 | 19,169,682      | 54.6                     | 12,745,469      | 36.3                     | 3,196,824  | 9.1                 |
|                  | OV_073     | 49,453,601 | 23,617,311      | 47.8                     | 19,270,095      | 39.0                     | 6,566,195  | 13.3                |
|                  | OV_074     | 52,513,597 | 15,321,899      | 29.2                     | 17,282,950      | 32.9                     | 19,908,748 | 37.9                |
| OV_075           | 35,076,332 | 17,847,059 | 50.9            | 13,117,957               | 37.4            | 4,111,316                | 11.7       |                     |
| OV_076           | 50,085,339 | 22,051,134 | 44.0            | 19,789,039               | 39.5            | 8,245,166                | 16.5       |                     |
| <b>Benign</b>    | OV_101     | 35,982,439 | 18,905,550      | 52.5                     | 13,199,791      | 36.7                     | 3,877,098  | 10.8                |
|                  | OV_102     | 37,199,837 | 19,162,457      | 51.5                     | 14,375,109      | 38.6                     | 3,662,271  | 9.8                 |
|                  | OV_103     | 40,955,993 | 18,611,600      | 45.4                     | 16,769,945      | 40.9                     | 5,574,448  | 13.6                |
|                  | OV_104     | 49,336,358 | 18,582,516      | 37.7                     | 19,303,868      | 39.1                     | 11,449,974 | 23.2                |
|                  | OV_105     | 44,648,838 | 20,856,473      | 46.7                     | 17,216,106      | 38.6                     | 6,576,259  | 14.7                |
|                  | OV_106     | 43,434,489 | 21,231,549      | 48.9                     | 15,480,300      | 35.6                     | 6,722,640  | 15.5                |
|                  | OV_107     | 35,258,170 | 19,131,147      | 54.3                     | 12,863,735      | 36.5                     | 3,263,288  | 9.3                 |
|                  | OV_108     | 51,700,565 | 18,560,364      | 35.9                     | 15,081,519      | 29.2                     | 18,058,682 | 34.9                |
|                  | OV_109     | 44,144,137 | 16,732,836      | 37.9                     | 17,254,924      | 39.1                     | 10,156,377 | 23.0                |
|                  | OV_110     | 47,173,294 | 21,358,552      | 45.3                     | 19,678,147      | 41.7                     | 6,136,595  | 13.0                |
|                  | OV_111     | 42,797,234 | 19,197,950      | 44.9                     | 18,308,895      | 42.8                     | 5,290,389  | 12.4                |
|                  | OV_112     | 39,499,697 | 17,787,453      | 45.0                     | 16,179,682      | 41.0                     | 5,532,562  | 14.0                |
|                  | OV_113     | 91,347,082 | 40,621,084      | 44.5                     | 34,398,620      | 37.7                     | 16,327,378 | 17.9                |
| OV_114           | 48,934,315 | 22,371,215 | 45.7            | 17,272,307               | 35.3            | 9,290,793                | 19.0       |                     |
| OV_115           | 48,485,468 | 22,177,750 | 45.7            | 15,400,110               | 31.8            | 10,907,608               | 22.5       |                     |
| OV_116           | 48,740,101 | 21,767,413 | 44.7            | 19,236,766               | 39.5            | 7,735,922                | 15.9       |                     |
| OV_117           | 45,005,117 | 19,214,791 | 42.7            | 18,074,570               | 40.2            | 7,715,756                | 17.1       |                     |
| OV_118           | 43,338,394 | 19,834,840 | 45.8            | 15,785,507               | 36.4            | 7,718,047                | 17.8       |                     |
| OV_119           | 41,904,360 | 18,953,302 | 45.2            | 17,008,211               | 40.6            | 5,942,847                | 14.2       |                     |
| OV_120           | 44,175,554 | 23,142,617 | 52.4            | 15,266,390               | 34.6            | 5,766,547                | 13.1       |                     |
| <b>Normal</b>    | OV_151     | 49,895,597 | 24,241,977      | 48.6                     | 18,773,542      | 37.6                     | 6,880,078  | 13.8                |
|                  | OV_152     | 45,559,845 | 22,086,025      | 48.5                     | 16,526,544      | 36.3                     | 6,947,276  | 15.2                |
|                  | OV_153     | 74,636,322 | 31,665,863      | 42.4                     | 26,905,305      | 36.0                     | 16,065,154 | 21.5                |
|                  | OV_154     | 44,601,004 | 18,729,283      | 42.0                     | 14,977,864      | 33.6                     | 10,893,857 | 24.4                |
|                  | OV_155     | 59,785,662 | 28,932,633      | 48.4                     | 19,958,773      | 33.4                     | 10,894,256 | 18.2                |
|                  | OV_156     | 29,422,662 | 13,900,866      | 47.2                     | 10,397,452      | 35.3                     | 5,124,344  | 17.4                |



**Supplementary Table S7.** The summary of primers for real-time quantitative reverse transcription PCR and bisulfite pyrosequencing

| Gene Name                    | Forward primer sequence (5' to 3') | Reverse primer sequence (5' to 3') | PCR size (bp) |
|------------------------------|------------------------------------|------------------------------------|---------------|
| For qRT-PCR                  |                                    |                                    |               |
| ADAMTS5                      | GCCAGCGGATGTGTGCAAGC               | ACACTTCCCCCGGACGCAGA               | 130           |
| AK1                          | GGGATGCCATGGTGGCCAAA               | ACAGCAGCAGTGTGGGCTGTC              | 120           |
| CCDC17                       | GTGCAGTGGCTGCGGCTATC               | CGCCTCGGACATGGGACTCT               | 120           |
| FGF12                        | CTCGGGGTGTTTCAGCAAAGTGCG           | TGTCACAATCCCTTTGAGCTGGGG           | 90            |
| FOXA1                        | TGGAAGGGCATGAAACCAGCGAC            | TGTTGCTGACCGGGACGGAG               | 81            |
| GAPDH                        | TGCACCACCAACTGCTTAGC               | GGCATGGACTGTGGTCATGAG              | 87            |
| GLI1                         | TCAACTCGATGACCCCACC                | AGACAGTCCTTCTGTCCCCACA             | 105           |
| GLI2                         | CACTCCAACGAGAAACCCTAC              | CTGCTTCTTGGTGACGTGG                | 126           |
| GLI3                         | AGGACCTCAGCAACTACTACC              | TGCATGAAGACTGACCACCA               | 111           |
| HNF1B                        | CGGCCTGAACCAGTCGCACC               | TGGACTGTCTGGTTGAATTGTCCGA          | 135           |
| HOXB5                        | CCACGCACTCTGCCTGTCCG               | CGCTGCCAGCTGTAGCCAGG               | 113           |
| IRS1                         | CTCCACCCGCCGCTCAAGTG               | GGTCTTCATTCTGCTGTGATGTCCA          | 110           |
| PHF2                         | CCCACGCCTGTCACGAAGCC               | GTGCAGCGAACCCCTCGTCCG              | 78            |
| PLEKHG2                      | AACCACCCTGCCTCCATCCCTG             | TTTGGGGGCACAATGCAGGCT              | 72            |
| SPON2                        | CCTTCATCCCTCCCGCCCA                | CCTCCGCACAGTCCCCAGGA               | 124           |
| SSBP4                        | GAGCACTCCGGCGAGGCCAA               | CCTGGAAGAAGCCAGCCGCCAT             | 127           |
| ZIC1                         | TTCGCGCGCTCCGAGAATTTA              | GCTTCTTGCGGTCGCTGCTGTTA            | 118           |
| ZIC2                         | CGAGAACCTCAAGATCCACAAAA            | CGTGCATGTGCTTCTTCCTGT              | 116           |
| ZIC4                         | GCTCTGGCTACGATTCGGCTACA            | CGGTGGACATCATTGCTCAA               | 131           |
| ZIC5                         | GTAATCATAAGGGGAAAAGCC              | GGTGTGGACATGGGAATGTTT              | 101           |
| For bisulfite pyrosequencing |                                    |                                    |               |
| ZIC1_py11                    | GTTGAATAGGGATATTTTGAAGTGT          | #ACTTTTCCTTCTCACAATCATATACAT       | 183           |
| ZIC1_py11 sequencing primer  |                                    | TTTTTGTGTGTTTATTAGTTTTAT           |               |

# The 5'-end biotinylated primer. The annealing temperature is 60°C.
